# Supplementary material for: Stellettin B induces apoptosis in human chronic myeloid leukemia cells via targeting PI3K and Stat5
Source: PubMed Central journal article supplement (PMC5438702; doi:10.18632/oncotarget.15957), 2017-03-07
Supplement: oncotarget-08-28906-s001.pdf [file oncotarget-08-28906-s001.pdf]

## Stelletin B induces apoptosis in human chronic myeloid leukemia cells via targeting PI3K and Stat5

### SUPPLEMENTARY FIGURES

**A**

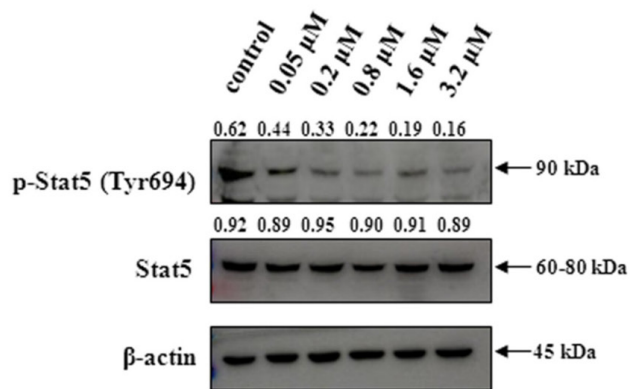

**B**

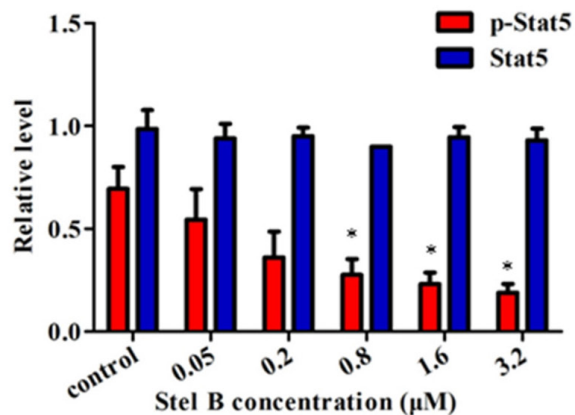

**Supplementary Figure 1: Effect of Stel B on Stat5 signaling in other CML KU812 cells.** (A) After exposure of KU812 cells with increasing doses of Stel B for 48 h, Stat5 and p-Stat5 levels were determined by Western blot. (B) Bar graphs represent mean ± SD of three independent experiments. \*:  $p < 0.05$ , compared with the control.

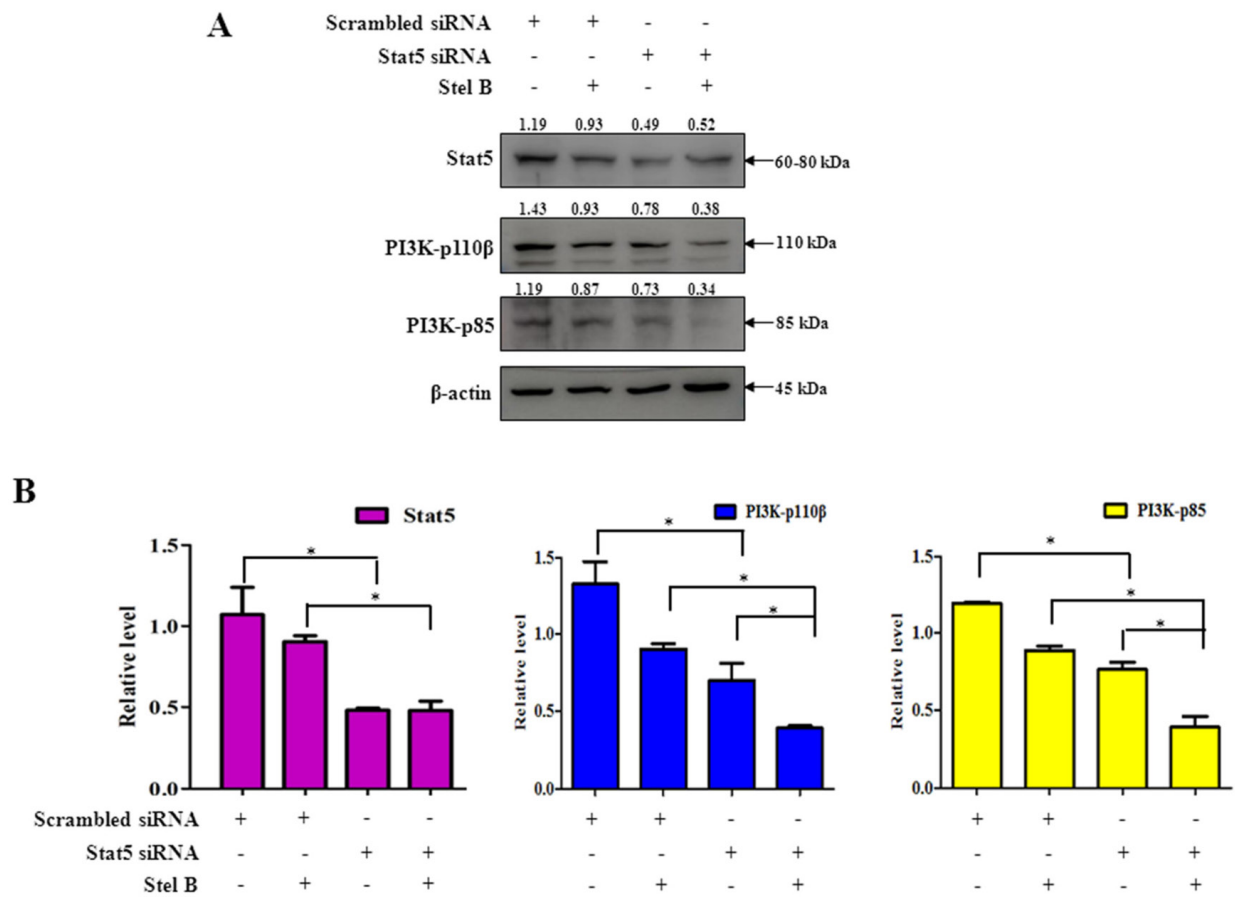

**Supplementary Figure 2: Effect of Stat5 siRNA on PI3K expression in K562 cells.** (A) K562 cells were transfected with siRNA of Stat5A and Stat5B for 6 h, then treated with Stel B (0, 0.036  $\mu$ M) for 48 h. Expression levels of Stat5, PI3K-p110 $\beta$  and PI3K-p85 were examined by Western blot. (B) Bar graphs represent mean  $\pm$  SD of three independent experiments. \*:  $p < 0.05$ , compared with the control.
